# Supplementary material for: Synthesis, magnetism, aqueous-two phase formation and physical properties of novel guanidinium-based magnetic ionic liquids
Source: Royal Society of Chemistry journal article supplement (doi:10.1039/c6ra09879g), 2016-01-01
Supplement: c6ra09879g1.pdf [file c6ra09879g1.pdf]

Supplementary Information for  
**Synthesis, magnetism, aqueous-two phase formation and physical  
properties of novel guanidinium-based magnetic ionic liquids**

Tian Yao, Shun Yao, Dan Tang, Long Jing , Daocai Wang, Hang Song\*

School of Chemical Engineering, Sichuan University, Chengdu 610065, China.

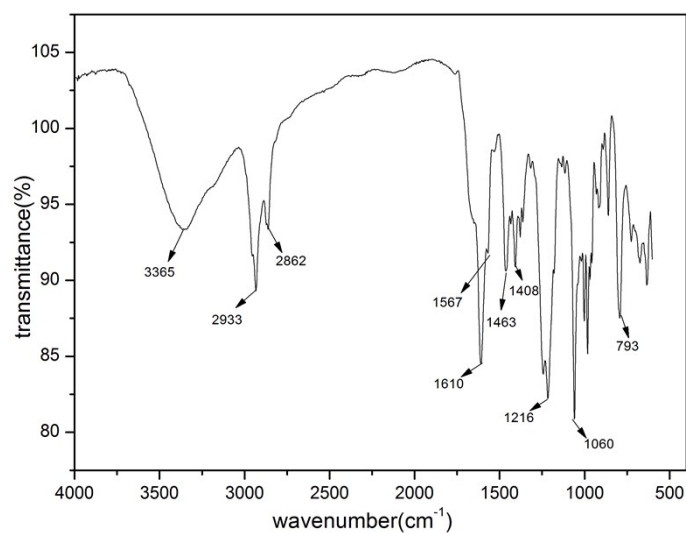

Figure S1. FT-IR spectrum of MIL 1.

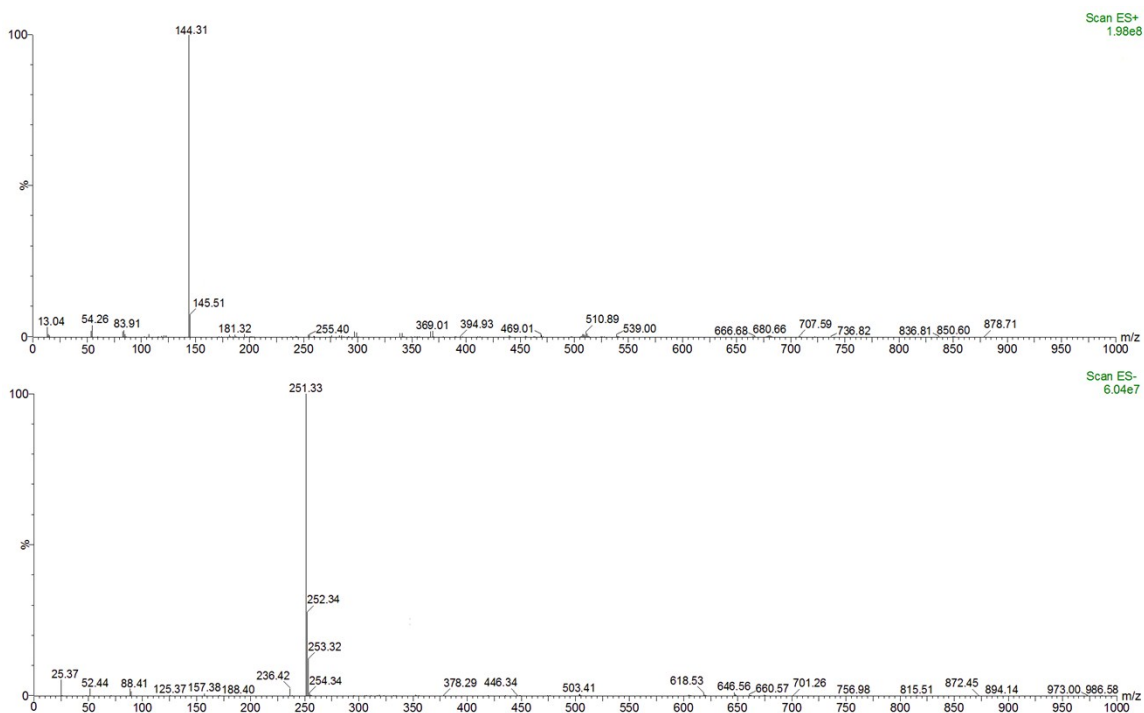

Figure S2. ESI-MS spectra of MIL 1

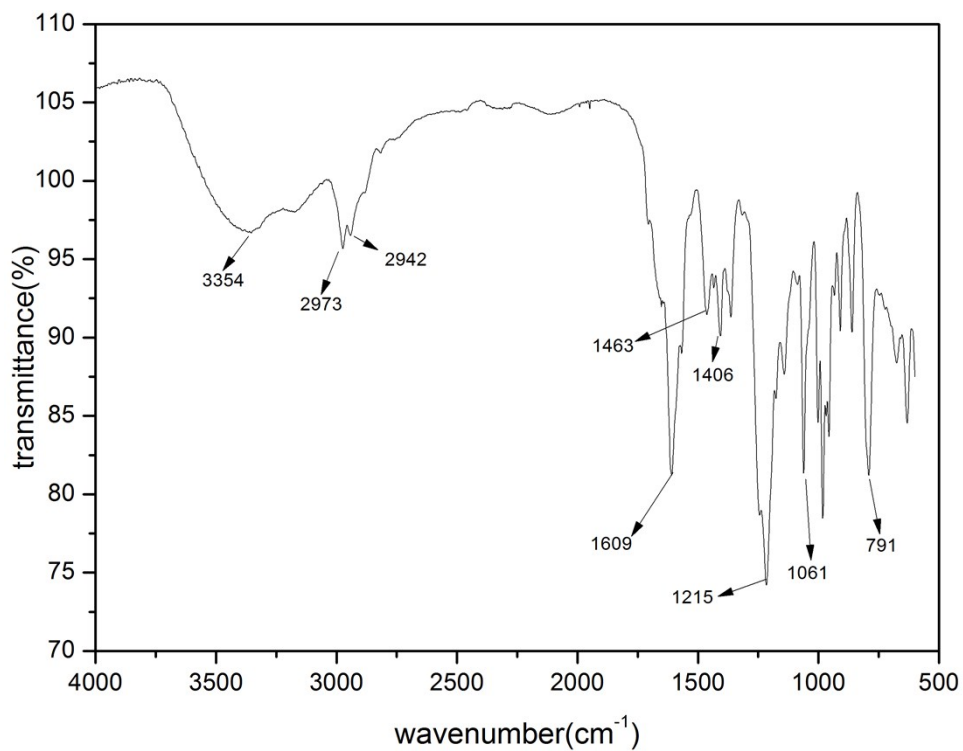

Figure S3. FT-IR spectrum of MIL 2.

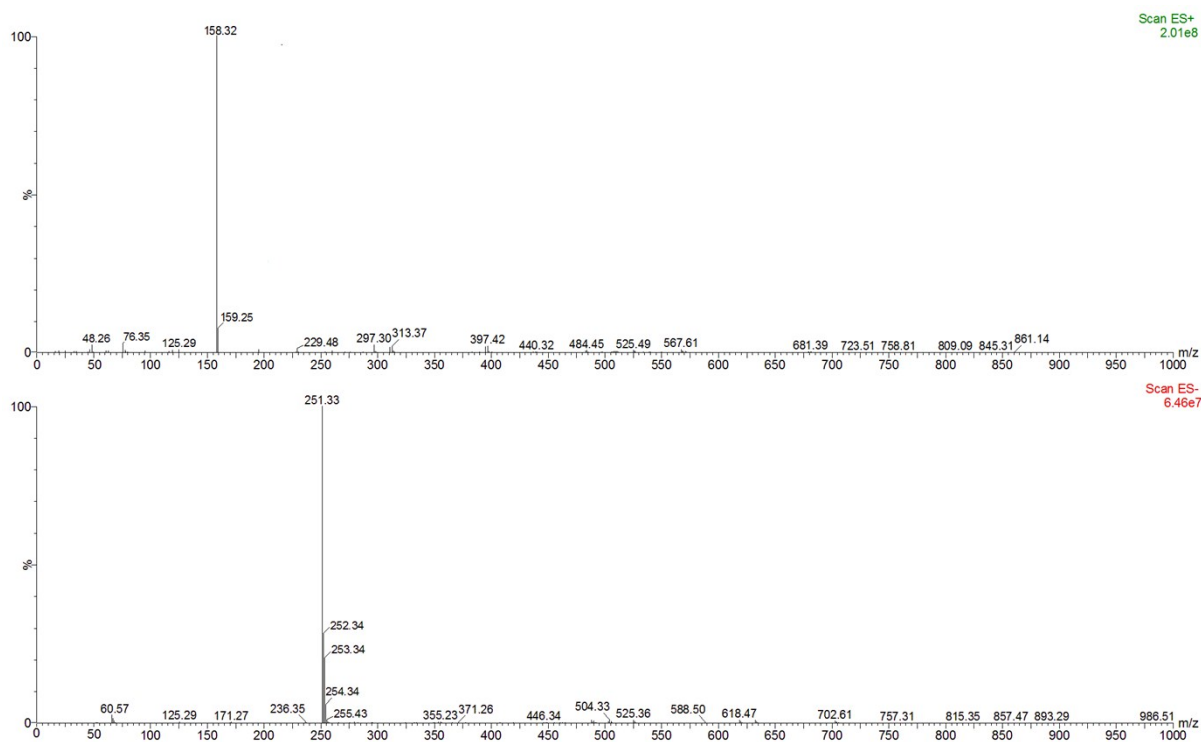

Figure S4. ESI-MS spectra of MIL 2

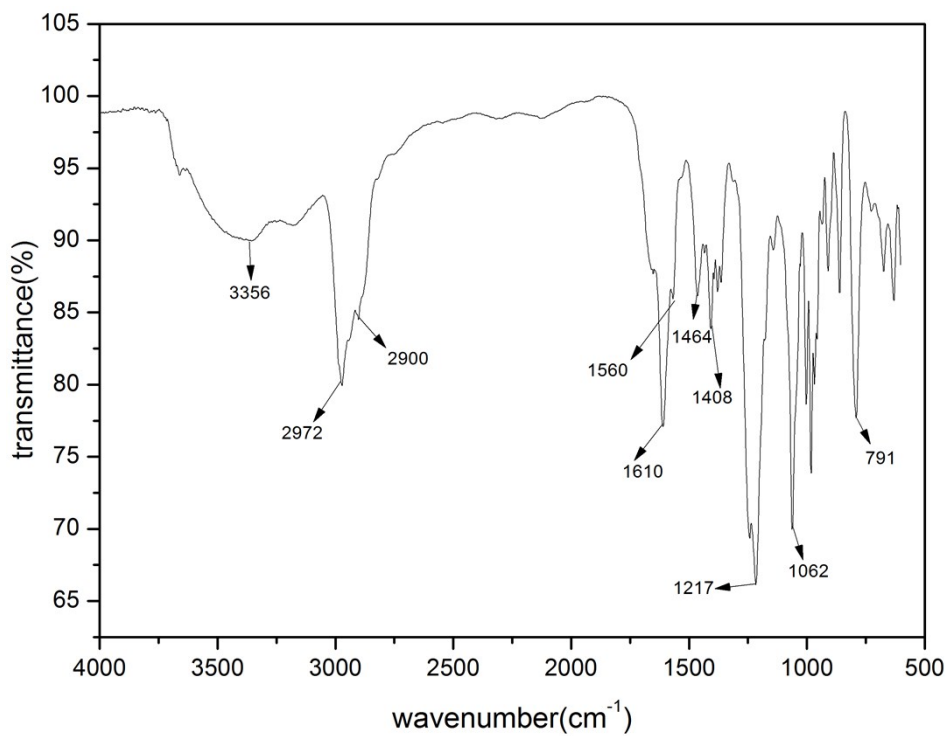

Figure S5. FT-IR spectrum of MIL 3.

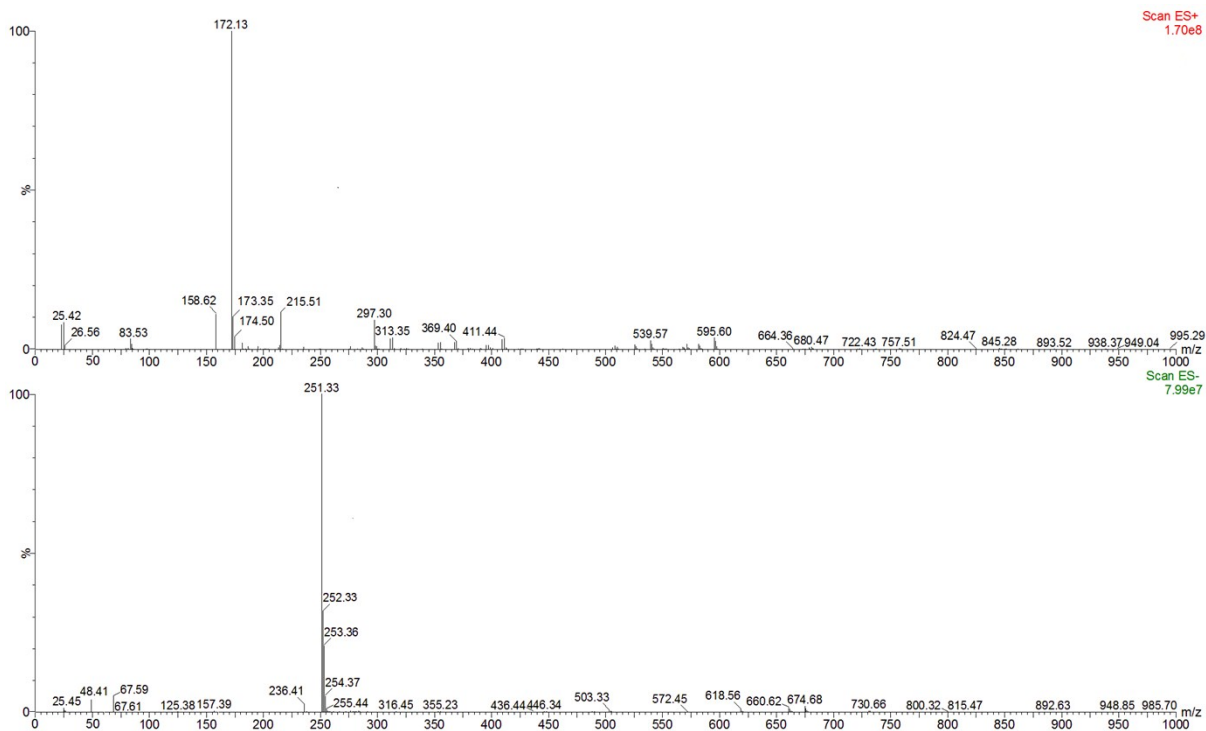

Figure S6. ESI-MS spectra of MIL 3.

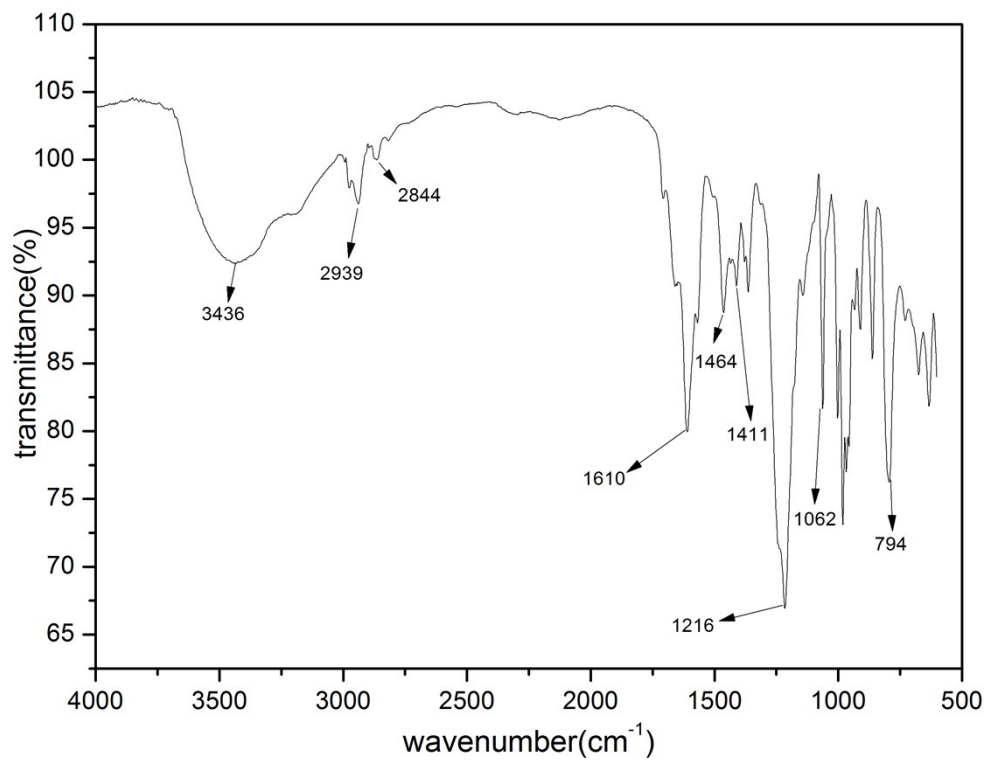

Figure S7. FT-IR spectrum of MIL 4.

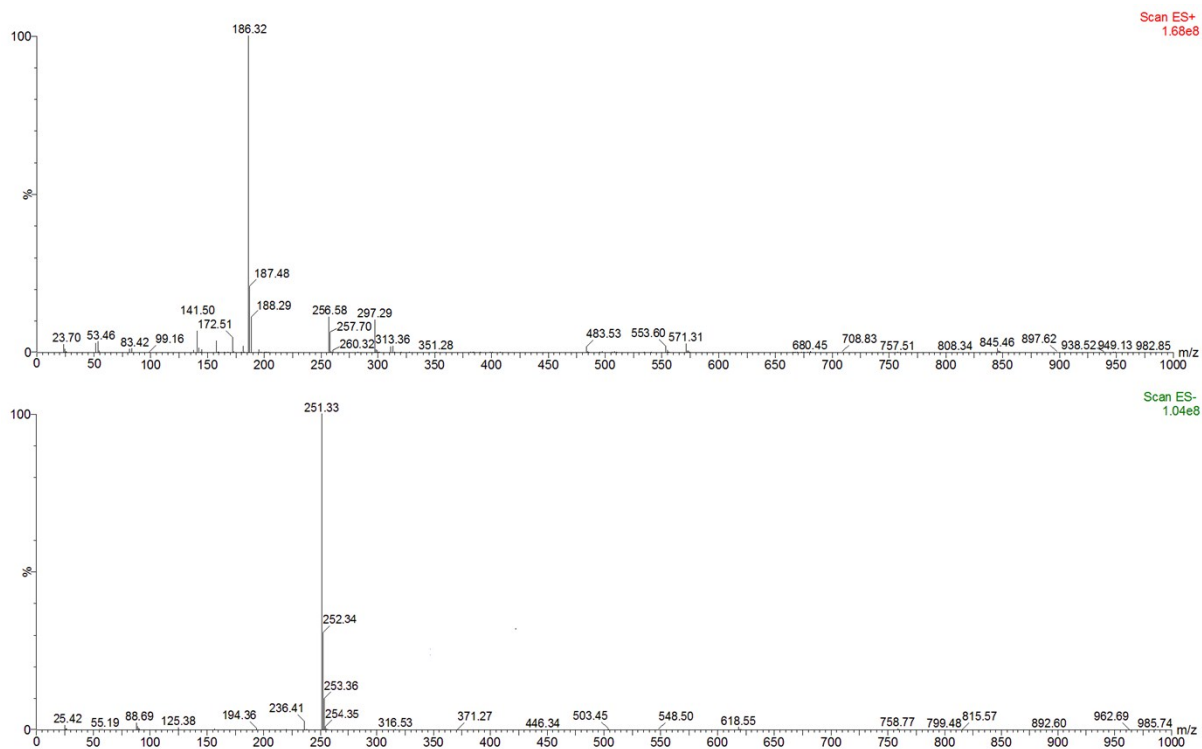

Figure S8. ESI-MS spectra of MIL 4.
